# Supplementary material for: The resveratrol-enriched rice DJ526 boosts motor coordination and physical strength
Source: PubMed Central journal article supplement (PMC4820726; doi:10.1038/srep23958), 2016-04-05
Supplement: srep23958-s1.pdf [file srep23958-s1.pdf]

## **SUPPLEMENTARY INFORMATION**

### **The resveratrol-enriched rice DJ526 boosts motor coordination and physical strength**

Hea-Jong Chung<sup>1,†</sup>, So-Hyeon Baek<sup>2,†</sup>, Satya Priya Sharma<sup>1</sup>, Hyeon-Jin Kim<sup>3</sup>, Seong-Tshool

Hong<sup>1,\*</sup>

Supplementary Tables 1, 2, 3, 4

Supplementary Figure 1, 2, 3 and legends

## Supplementary Tables

**Supplementary Table S1: The compositional variation of the Formula Diet fed to the experimental mice**

| <b>Ingredient</b>               | <b>Ctrl</b>    | <b>RS</b>      | <b>DJ</b>      | <b>DJ526</b>   |
|---------------------------------|----------------|----------------|----------------|----------------|
| Casein                          | 200            | 200            | 200            | 200            |
| L-Cysteine                      | 3              | 3              | 3              | 3              |
| <b>Corn Starch</b>              | <b>397.486</b> | <b>397.486</b> | <b>0</b>       | <b>0</b>       |
| <b>Sucrose</b>                  | <b>100</b>     | <b>100</b>     | <b>0</b>       | <b>0</b>       |
| Maltodextrin                    | 132            | 132            | 132            | 132            |
| Soybean Oil                     | 70             | 70             | 70             | 70             |
| Cellulose                       | 50             | 50             | 50             | 50             |
| Mineral Mix, AIN-93G-MX (94046) | 35             | 35             | 35             | 35             |
| Vitamin Mix, AIN-93-VX (94047)  | 10             | 10             | 10             | 10             |
| Choline Bitartrate              | 2.5            | 2.5            | 2.5            | 2.5            |
| TBHQ, Antioxidant               | 0.014          | 0.014          | 0.014          | 0.014          |
| <b>Resveratrol</b>              | <b>0</b>       | <b>0.00098</b> | <b>0</b>       | <b>0</b>       |
| <b>Dongjin Rice</b>             | <b>0</b>       | <b>0</b>       | <b>497.486</b> | <b>0</b>       |
| <b>Dongjin-526 Rice</b>         | <b>0</b>       | <b>0</b>       | <b>0</b>       | <b>497.486</b> |
| Total (g)                       | 1000           | 1000           | 1000           | 1000           |

All diet formulations were based on the diet formula of nonfat normal diet (TD.94045 AIN-93G) of Raonbio (Seoul, Korea), which is the control diet in this experiment. Deviations from the control are indicated in bold. The resveratrol concentration in all of the formula diets was quantified by HPLC (ACQUITY UPLC, Waters, MA, USA). The resveratrol quantities were 0.69  $\mu\text{g/g}$  in resveratrol-enriched DJ526 diet (DJ526) and resveratrol diet (RS) each. However, resveratrol was not detected in control diet (Ctrl) and dongjin rice diet (DJ).

**Supplementary Table S2: Differentially expressed genes by effect of resveratrol, Dongjin rice, and the resveratrol-enriched rice DJ526 (DJ526)**

| <b>Gene</b>   | <b>Z ratios<br/>RS/Ctrl</b> | <b>Gene</b>  | <b>Z ratios<br/>RS/Ctrl</b> |
|---------------|-----------------------------|--------------|-----------------------------|
| Sult2a4       | 11.07                       | Pde5a        | -11.02                      |
| Sult2a1       | 9.13                        | Dirc2        | -6.80                       |
| Sult2a3       | 8.36                        | Serpina4-ps1 | -6.73                       |
| Gm6168        | 7.30                        | Emilin3      | -6.08                       |
| Sult2a6       | 6.77                        | Crygf        | -5.55                       |
| Ap3b2         | 5.63                        | Dnahc7a      | -5.53                       |
| 2310038E17Rik | 5.33                        | Gypa         | -5.40                       |
| Gm11435       | 5.16                        | Bves         | -4.71                       |
| Cd70          | 5.12                        | Olf681       | -4.47                       |
| Olf1106       | 5.07                        | Pbx1         | -3.93                       |

  

| <b>Gene</b>   | <b>Z ratios<br/>DJ/Ctrl</b> | <b>Gene</b>   | <b>Z ratios<br/>DJ/Ctrl</b> |
|---------------|-----------------------------|---------------|-----------------------------|
| Csf3          | 5.53                        | Duoxa1        | -5.88                       |
| Sub1          | 5.36                        | Pnoc          | -5.68                       |
| Olf467        | 5.03                        | Olf877        | -4.49                       |
| Serp1b1c      | 4.95                        | EG668249      | -4.48                       |
| Ccnb1ip1      | 4.93                        | Prdm14        | -4.47                       |
| 4930578C19Rik | 4.93                        | Shh           | -4.22                       |
| D330041H03Rik | 4.35                        | Olf1513       | -4.03                       |
| Dctd          | 4.28                        | 2410012M07Rik | -4.00                       |
| H2-M5         | 4.21                        | Myh13         | -3.71                       |
| Olf915        | 3.95                        | Chn1          | -3.61                       |

  

| <b>Gene</b> | <b>Z ratios<br/>DJ526/Ctrl</b> | <b>Gene</b>   | <b>Z ratios<br/>DJ526/Ctrl</b> |
|-------------|--------------------------------|---------------|--------------------------------|
| Sult2a6     | 5.65                           | Gpr31c        | -7.46                          |
| Ap3b2       | 5.13                           | Spock1        | -6.72                          |
| Tnfaip6     | 5.08                           | Olf638        | -6.29                          |
| Tas1r2      | 4.88                           | Olf453        | -6.03                          |
| Arsi        | 4.77                           | Fgf15         | -5.97                          |
| Olf119      | 4.62                           | Gm4050        | -5.76                          |
| Trim43b     | 4.57                           | Dnahc1        | -5.73                          |
| H2-M5       | 4.39                           | 2810049E08Rik | -5.64                          |
| Olf569      | 4.37                           | Gm14003       | -5.42                          |
| Usp54       | 4.21                           | Gm4794        | -5.19                          |

The most highly significant up-regulated and down-regulated genes in the livers of mice on resveratrol diet (RS), dongjin rice diet (DJ) and resveratrol-enriched DJ526 diet (DJ526) towards those on a control diet (Ctrl) groups are shown. Genes were filtered using a cutoff Z-ratio  $\pm 1.5$  and P-value of  $< 0.05$ . Genes meeting these criteria were ranked by Z-ratio.

**Supplementary Table S3: The most highly significant up-regulated and down-regulated pathways in the livers of mice on resveratrol diet (RS), Dongjin rice diet (DJ) and the resveratrol-enriched DJ526 diet (DJ526) towards those on the control diet (Ctrl) groups**

| <b>RS/Ctrl</b> |                                                                                                                                                                                                                                                                                                                                                                                                                                                                                                                                                                                                                                                                                                                    |
|----------------|--------------------------------------------------------------------------------------------------------------------------------------------------------------------------------------------------------------------------------------------------------------------------------------------------------------------------------------------------------------------------------------------------------------------------------------------------------------------------------------------------------------------------------------------------------------------------------------------------------------------------------------------------------------------------------------------------------------------|
| <b>Up</b>      | gene_sets.gmt#BIOCARTA_NO2IL12_PATHWAY<br>gene_sets.gmt#KEGG_INTESTINAL_IMMUNE_NETWORK_FOR_IGA_PRODUCTION<br>gene_sets.gmt#REACTOME_KINESINS<br>gene_sets.gmt#KEGG_TASTE_TRANSDUCTION<br>gene_sets.gmt#PID_TCR_CALCIIUM_PATHWAY<br>gene_sets.gmt#PID_IL12_2PATHWAY<br>gene_sets.gmt#PID_IL12_STAT4_PATHWAY<br>gene_sets.gmt#BIOCARTA_INFLAM_PATHWAY<br>gene_sets.gmt#PID_CD8_TCR_DOWNSTREAM_PATHWAY<br>gene_sets.gmt#BIOCARTA_CTLA4_PATHWAY<br>gene_sets.gmt#PID_AURORA_B_PATHWAY<br>gene_sets.gmt#BIOCARTA_NKT_PATHWAY                                                                                                                                                                                            |
| <b>Down</b>    | gene_sets.gmt#BIOCARTA_PROTEASOME_PATHWAY<br>gene_sets.gmt#HALLMARK_MYC_TARGETS_V1<br>gene_sets.gmt#REACTOME_DESTABILIZATION_OF_MRNA_BY_AUF1_HNRNP_D0<br>gene_sets.gmt#KEGG_BIOSYNTHESIS_OF_UNSATURATED_FATTY_ACIDS<br>gene_sets.gmt#REACTOME_REGULATION_OF_APOPTOSIS<br>gene_sets.gmt#HALLMARK_MTORC1_SIGNALING<br>gene_sets.gmt#REACTOME_VIF_MEDIATED_DEGRADATION_OF_APOBEC3G<br>gene_sets.gmt#REACTOME_AUTODEGRADATION_OF_THE_E3_UBIQUITIN_LIGASE_COPI<br>gene_sets.gmt#REACTOME_RORA_ACTIVATES_CIRCADIAN_EXPRESSION<br>gene_sets.gmt#REACTOME_CROSS_PRESENTATION_OF_SOLUBLE_EXOGENOUS_ANTIGENS_ENDOSOMES<br>gene_sets.gmt#PID_ECADHERIN_KERATINOCYTE_PATHWAY<br>gene_sets.gmt#HALLMARK_CHOLESTEROL_HOMEOSTASIS |
| <b>DJ/Ctrl</b> |                                                                                                                                                                                                                                                                                                                                                                                                                                                                                                                                                                                                                                                                                                                    |
| <b>Up</b>      | gene_sets.gmt#KEGG_PRIMARY_IMMUNODEFICIENCY<br>gene_sets.gmt#REACTOME_DEGRADATION_OF_THE_EXTRACELLULAR_MATRIX<br>gene_sets.gmt#PID_CD8_TCR_DOWNSTREAM_PATHWAY<br>gene_sets.gmt#BIOCARTA_NO2IL12_PATHWAY<br>gene_sets.gmt#ST_TUMOR_NECROSIS_FACTOR_PATHWAY<br>gene_sets.gmt#PID_IL12_2PATHWAY<br>gene_sets.gmt#REACTOME_BASE_EXCISION_REPAIR<br>gene_sets.gmt#REACTOME_NEF_MEDIATES_DOWN_MODULATION_OF_CELL_SURFACE_RECEPTORS_BY_RECRUITING_THEM_TO_CLATHRIN_ADAPTERS<br>gene_sets.gmt#KEGG_BASE_EXCISION_REPAIR<br>gene_sets.gmt#PID_AURORA_B_PATHWAY<br>gene_sets.gmt#BIOCARTA_TNFR2_PATHWAY<br>gene_sets.gmt#BIOCARTA_HIVNEF_PATHWAY                                                                             |
| <b>Down</b>    | gene_sets.gmt#KEGG_MATURITY_ONSET_DIABETES_OF_THE_YOUNG<br>gene_sets.gmt#REACTOME_SIGNALING_BY_NODAL<br>gene_sets.gmt#REACTOME_REGULATION_OF_GENE_EXPRESSION_IN_BETA_CELLS<br>gene_sets.gmt#PID_CONE_PATHWAY<br>gene_sets.gmt#KEGG_GLYCOSPHINGOLIPID_BIOSYNTHESIS_LACTO_AND_NEOLACTO_SERIES<br>gene_sets.gmt#PID_RHODOPSIN_PATHWAY<br>gene_sets.gmt#BIOCARTA_P53HYPOXIA_PATHWAY<br>gene_sets.gmt#PID_PI3K_PLC_TRK_PATHWAY<br>gene_sets.gmt#BIOCARTA_SHH_PATHWAY<br>gene_sets.gmt#REACTOME_ACTIVATED_AMPK_STIMULATES_FATTY_ACID_OXIDATION_IN_MUSCLE<br>gene_sets.gmt#REACTOME_REGULATION_OF_BETA_CELL_DEVELOPMENT<br>gene_sets.gmt#BIOCARTA_PGC1A_PATHWAY                                                           |

---

**DJ526/Ctrl**

---

|             |                                                                                                                                                                                                                                                                                                                                                                                                                                                                                                                                                                                                                                                                                                                                                   |
|-------------|---------------------------------------------------------------------------------------------------------------------------------------------------------------------------------------------------------------------------------------------------------------------------------------------------------------------------------------------------------------------------------------------------------------------------------------------------------------------------------------------------------------------------------------------------------------------------------------------------------------------------------------------------------------------------------------------------------------------------------------------------|
| <b>Up</b>   | gene_sets.gmt#KEGG_TASTE_TRANSDUCTION<br>gene_sets.gmt#KEGG_INTESTINAL_IMMUNE_NETWORK_FOR_IGA_PRODUCTION<br>gene_sets.gmt#PID_CD8_TCR_DOWNSTREAM_PATHWAY<br>gene_sets.gmt#PID_NFAT_TFPATHWAY<br>gene_sets.gmt#HALLMARK_E2F_TARGETS<br>gene_sets.gmt#REACTOME_ERK_MAPK_TARGETS<br>gene_sets.gmt#KEGG_GRAFT_VERSUS_HOST_DISEASE<br>gene_sets.gmt#REACTOME_NUCLEAR_EVENTS_KINASE_AND_TRANSCRIPTION_FACTOR_ACTIVATION<br>gene_sets.gmt#PID_AURORA_B_PATHWAY<br>gene_sets.gmt#REACTOME_SYNTHESIS_SECRETION_AND_INACTIVATION_OF_GLP1<br>gene_sets.gmt#REACTOME_INCRETIN_SYNTHESIS_SECRETION_AND_INACTIVATION<br>gene_sets.gmt#PID_PLK1_PATHWAY                                                                                                          |
| <b>Down</b> | gene_sets.gmt#KEGG_OXIDATIVE_PHOSPHORYLATION<br>gene_sets.gmt#HALLMARK_FATTY_ACID_METABOLISM<br>gene_sets.gmt#KEGG_PPAR_SIGNALING_PATHWAY<br>gene_sets.gmt#KEGG_PRIMARY_BILE_ACID_BIOSYNTHESIS<br>gene_sets.gmt#REACTOME_RESPIRATORY_ELECTRON_TRANSPORT_ATP_SYNTHESIS_BY_CHEMIOSMOTIC_COUPLING_AND_HEAT_PRODUCTION_BY_UNCOUPLING_PROTEINS<br>gene_sets.gmt#REACTOME_SYNTHESIS_OF_BILE_ACIDS_AND_BILE_SALTS<br>gene_sets.gmt#REACTOME_RESPIRATORY_ELECTRON_TRANSPORT<br>gene_sets.gmt#REACTOME_TRIGLYCERIDE_BIOSYNTHESIS<br>gene_sets.gmt#PID_SMAD2_3PATHWAY<br>gene_sets.gmt#HALLMARK_ANGIOGENESIS<br>gene_sets.gmt#HALLMARK_OXIDATIVE_PHOSPHORYLATION<br>gene_sets.gmt#REACTOME_LATENT_INFECTION_OF_HOMO_SAPIENS_WITH_MYCOBACTERIUM_TUBERCULOSIS |

---

**Supplementary Table S4: List of primer used for quantitative real-time PCR**

| <b>Primer name</b> | <b>Accession No.</b> | <b>Nucleotide Sequence (5'→3')</b> | <b>5' Position</b> | <b>Target length</b> |
|--------------------|----------------------|------------------------------------|--------------------|----------------------|
| <b>Sult2a4-F</b>   | NM_001101534.1       | TCCAGGGTCACTCAGAACTT               | 423                | 72                   |
| <b>Sult2a4-R</b>   | NM_001101534.1       | TGCTCAAACCATGATCCATA               | 494                | 72                   |
| <b>Ap3b2-F</b>     | NM_021492.3          | TTCAAGAAGGAACAGGGAAA               | 3249               | 70                   |
| <b>Ap3b2-R</b>     | NM_021492.3          | AGGTGTCTGGCAATGTAAGC               | 3318               | 70                   |
| <b>Duoxa1-F</b>    | NM_145395.2          | CTGGTAGCCACTGAGTTTCC               | 1312               | 70                   |
| <b>Duoxa1-R</b>    | NM_145395.2          | GGACAGTTCTGCTGGTTTTG               | 1381               | 70                   |
| <b>Pnoc-F</b>      | NM_010932.2          | GCCCCATCTTCTCACTCATC               | 1170               | 70                   |
| <b>Pnoc-R</b>      | NM_010932.2          | CCCAGGTCTGATTTCATGTT               | 1239               | 70                   |
| <b>Sub1-F</b>      | ENSMUST00000110504   | CGGACAGCGAAGTTGAAAAA               | 164                | 70                   |
| <b>Sub1-R</b>      | ENSMUST00000110504   | TGCTTCTTCACGGGCTTCTC               | 233                | 70                   |
| <b>Sult2a1-F</b>   | NM_001111296.2       | CCAGGGTCACTCGGAACTTA               | 481                | 70                   |
| <b>Sult2a1-R</b>   | NM_001111296.2       | GCTCAAACCATGATCCGAAT               | 550                | 70                   |
| <b>Sult2a6-F</b>   | NM_001081325.2       | GAACGTTACCCCTGGCTAGA               | 254                | 70                   |
| <b>Sult2a6-R</b>   | NM_001081325.2       | TGAGTCGTGGTCCTTCCTTA               | 323                | 70                   |
| <b>GAPDH-F</b>     | NM_008084.3          | GGCATTGCTCTCAATGACAA               | 1132               | 95                   |
| <b>GAPDH-R</b>     | NM_008084.3          | ATGRAGGCCATGAGGTCCAC               | 1226               | 95                   |

F, forward; R, reverse

## Supplementary Figures

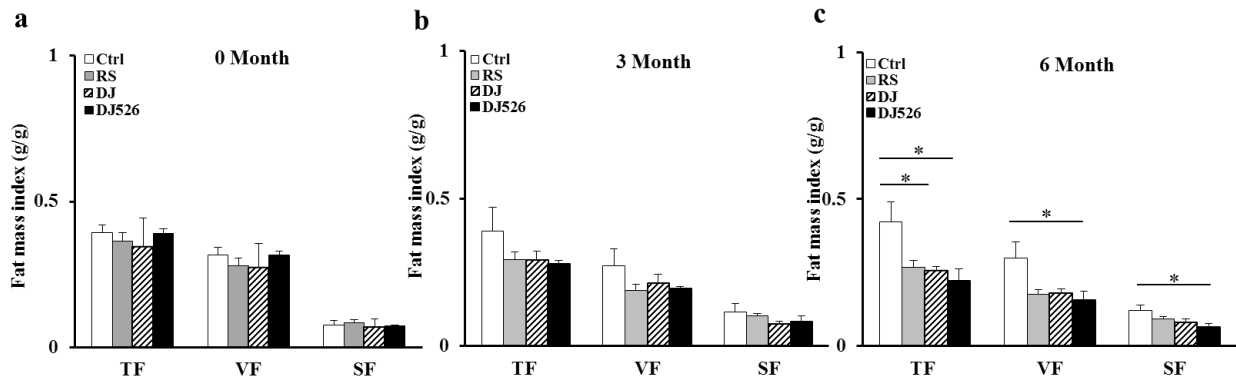

**Supplementary Figure S1. The effects of the resveratrol-enriched rice DJ526 on changes in fat mass index with age-progression.** The control (Ctrl) mice fed a NFD in which the carbohydrate source was corn starch and sucrose; the resveratrol (RS) mice fed a NFD in which the carbohydrate source was corn starch and sucrose except containing resveratrol; Dongjin (DJ) mice fed a NFD in which the corn starch and sucrose were replaced with Dongjin rice; DJ526, mice fed a NFD in which the corn starch and sucrose were replaced with the resveratrol enriched rice DJ526. The resveratrol concentration in DJ526 and RS groups was 0.69  $\mu\text{g/g}$  each, and not detected in Ctrl and DJ groups. Comparative analysis of the fat mass index (fat mass/total body weight) of mice at 0 month (a), 3 months (b), and at 6 months (c). The values represent the mean  $\pm$  s.d. (n=20). Values in the figure with a superscripted letter indicate statistical significance as analyzed by an unpaired Student's t-test; \*p < 0.05 compared with Ctrl.

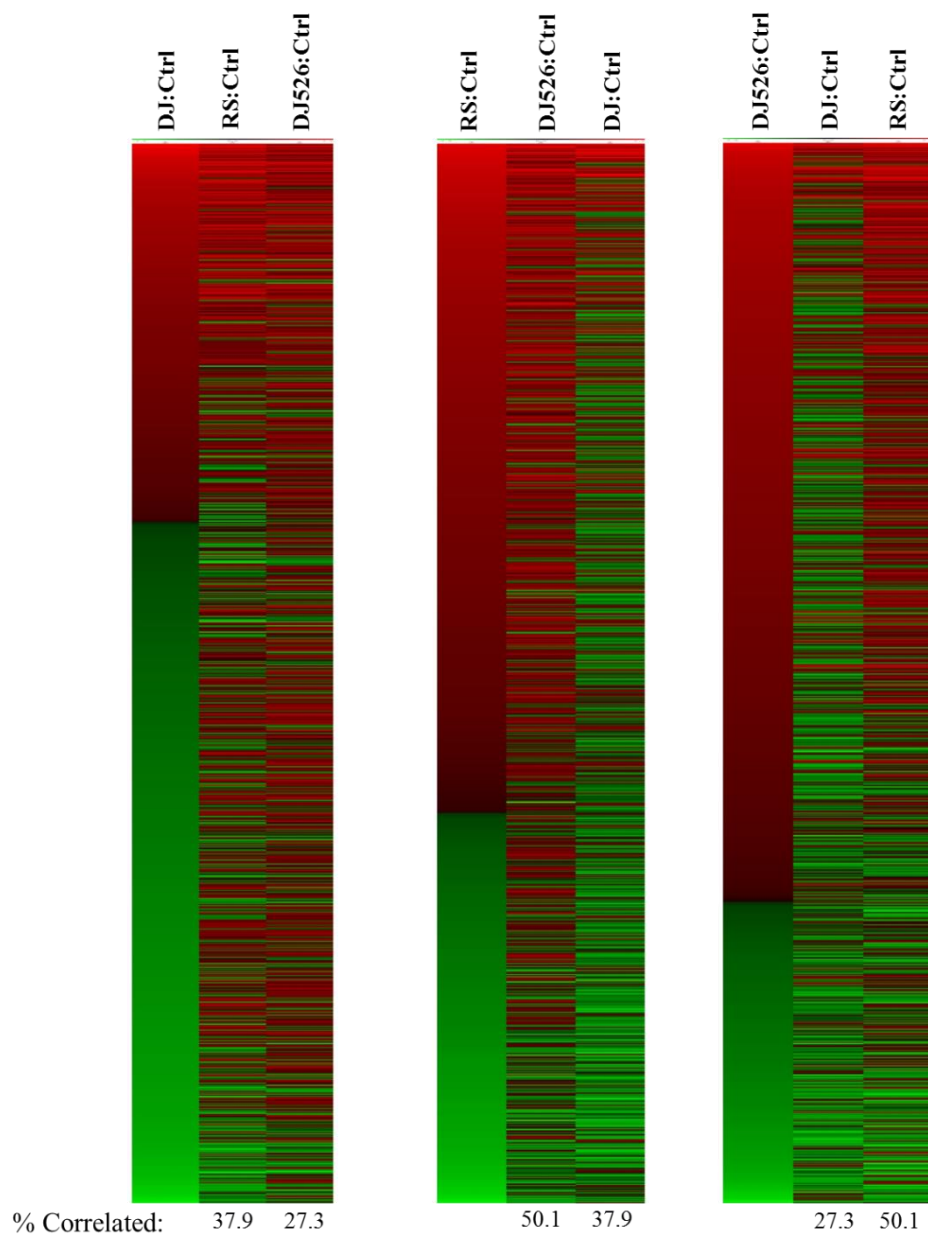

**Supplementary Figure S2.** The gene set enrichment analysis of the microarray data from the mice on resveratrol (RS), Dongjin rice (DJ), resveratrol-enriched rice DJ526 (DJ526), or control (Ctrl) diet. The control (Ctrl) mice fed a NFD in which the carbohydrate source was corn starch and sucrose; The resveratrol (RS) mice fed a NFD in which the carbohydrate source was corn starch and sucrose except containing resveratrol; Dongjin (DJ) mice fed a NFD in which the corn starch and sucrose were replaced with



Dongjin rice; DJ526, mice fed a NFD in which the corn starch and sucrose were replaced with the resveratrol enriched rice DJ526. The resveratrol concentration in DJ526 and RS groups was 0.69  $\mu\text{g/g}$  each, and not detected in Ctrl and DJ groups. Columns show every pathway significantly up-regulated (red) or down-regulated (green) by each treatment at the end of the 6 month feeding experiments.

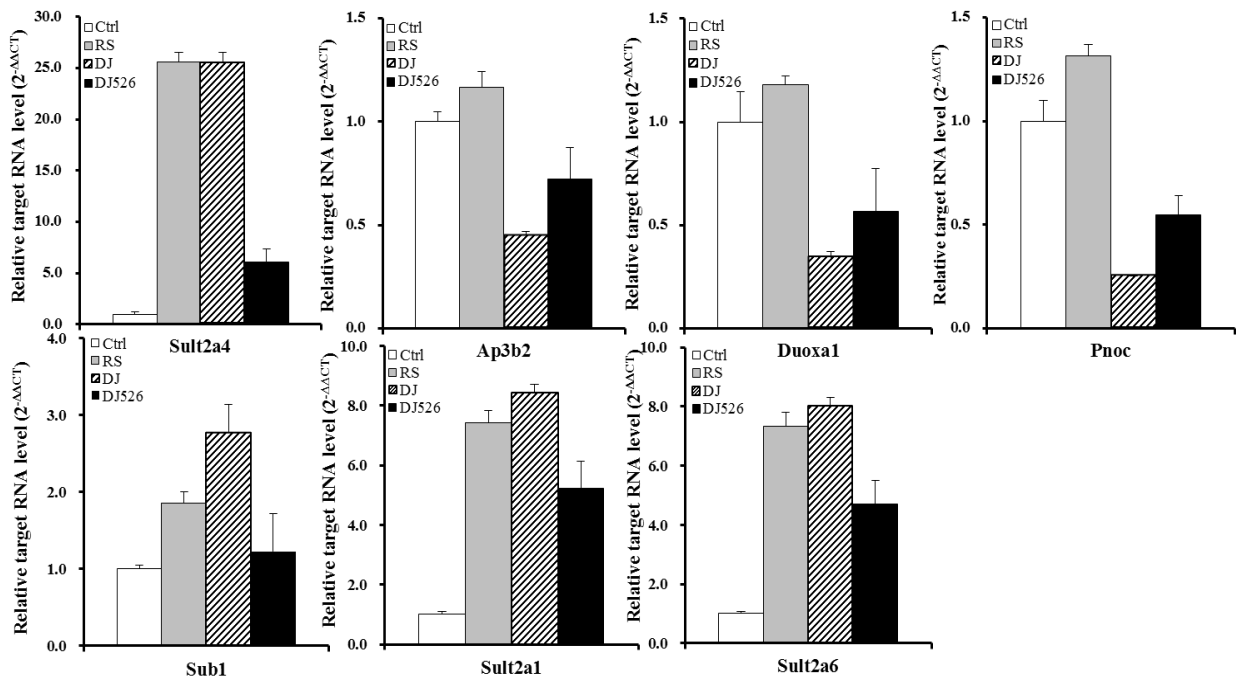

| Gene symbol    | Relative target RNA level ( $2^{-\Delta\Delta C_t}$ ) |       |       |       | Z ratio (Array) |         |            | Fold change (Array) |         |            |
|----------------|-------------------------------------------------------|-------|-------|-------|-----------------|---------|------------|---------------------|---------|------------|
|                | Ctrl                                                  | RS    | DJ    | DJ526 | RS/Ctrl         | DJ/Ctrl | DJ526/Ctrl | RS/Ctrl             | DJ/Ctrl | DJ526/Ctrl |
| <b>Sult2a4</b> | 1                                                     | 25.61 | 25.52 | 6.1   | 11.07           | 7.99    | 6.70       | 15.86               | 18.48   | 10.60      |
| <b>Ap3b2</b>   | 1                                                     | 1.17  | 0.45  | 0.72  | 5.63            | 3.36    | 5.13       | 4.75                | 2.61    | 5.15       |
| <b>Duoxa1</b>  | 1                                                     | 1.18  | 0.34  | 0.57  | -1.83           | -5.88   | -4.34      | 0.87                | 0.20    | 0.42       |
| <b>Pnoc</b>    | 1                                                     | 1.31  | 0.25  | 0.55  | -4.27           | -5.68   | -4.18      | 0.49                | 0.23    | 0.29       |
| <b>Sub1</b>    | 1                                                     | 1.86  | 2.78  | 1.22  | 3.08            | 5.36    | 2.17       | 2.57                | 3.66    | 2.09       |
| <b>Sult2a1</b> | 1                                                     | 7.44  | 8.42  | 5.22  | 9.13            | 6.46    | 5.15       | 9.49                | 10.99   | 5.95       |
| <b>Sult2a6</b> | 1                                                     | 7.33  | 8.02  | 4.7   | 6.77            | 4.63    | 3.70       | 4.96                | 5.00    | 3.27       |

**Supplementary Figure S3. Validation of the microarray results by quantitative real-time PCR from the mice on resveratrol (RS), Dongjin rice (DJ), resveratrol-enriched rice DJ526 (DJ526), or control (Ctrl) diet.** Total RNAs from the liver samples of Ctrl, RS, DJ or DJ526 groups were amplified using the primers specific for the indicated targets. The targets were selected based on the Z scores obtained by the microarray analyses, which were provided for the purposes of comparison. Note that Z score numbers reflect statistical confidence and do not relate directly to fold-change.
